# Supplementary material for: A Novel Intensity-Based Approach to Increasing Prefrontal Cerebral Oxygenation by Walking Exercise
Source: MDPI journal article supplement (doi:10.3390/jpm12040510), 2022-03-22
Supplement: s1 [file s1]

**Table S1.** Mean changes in HEG from phase to phase of exercise session in **male** (N = 55).

| Variables                    | $\beta$   | SE    | $\chi^2$ | p          |
|------------------------------|-----------|-------|----------|------------|
| Intensity* ^                 |           |       |          |            |
| Moderate                     | Reference |       |          |            |
| Low/Mod                      | -10.66    | 9.74  | 0.62     | .27        |
| Low                          | 1.04      | 8.81  | 0.01     | .91        |
| Very Low                     | 8.45      | 10.73 | 1.20     | .43        |
| Phase <sup>#</sup>           |           |       |          |            |
| Baseline                     | Reference |       |          |            |
| Warmup                       | 12.17     | 6.02  | 4.09     | .88        |
| Exercise                     | 2.65      | 5.35  | 0.24     | .46        |
| Cool down                    | 3.34      | 4.49  | 0.55     | .62        |
| Recovery                     | -0.51     | 3.27  | 0.03     | .04        |
| Intensity × Phase            |           |       |          |            |
| Very Low × Recovery          | -21.08    | 9.20  | 5.26     | <b>.02</b> |
| Very Low × Cool down         | -8.46     | 8.18  | 1.07     | .30        |
| Very Low × Exercise          | -10.32    | 6.86  | 2.26     | .13        |
| Very Low × Warmup            | -5.62     | 4.99  | 1.27     | .26        |
| Very Low × Baseline          | Reference |       |          |            |
| Low × Recovery               | -7.32     | 7.55  | 0.94     | .33        |
| Low × Cool down              | -0.87     | 6.72  | 0.02     | .90        |
| Low × Exercise               | -1.93     | 5.63  | 0.12     | .73        |
| Low × Warmup                 | -0.32     | 4.09  | 0.006    | .94        |
| Low × Baseline               | Reference |       |          |            |
| Low/Mod × Recovery           | -10.79    | 8.35  | 1.67     | .20        |
| Low/Mod × Cool down          | -0.11     | 7.42  | <0.001   | .99        |
| Low/Mod × Exercise           | -0.78     | 6.23  | 0.02     | .90        |
| Low/Mod × Warmup             | 0.79      | 4.53  | 0.03     | .86        |
| Low/Mod × Baseline           | Reference |       |          |            |
| Weekly frequency of exercise | 4.20      | 2.07  | 4.12     | <b>.04</b> |

Results were obtained from a generalized estimating equation (GEE), using a model-based estimator structured as an AR1 correlation matrix with a normal probability distribution and an identity link function.

\*Cardiac force meter (CFM) ranges: Moderate, <37.5; Low/Mod(erate), 37.6–42.5; Low, 42.6–47.5; Very Low, > 47.5.

^GEE results are for change from moderate to very low.

<sup>#</sup>GEE results are for change from baseline to recovery.

**Table S2.** Mean changes in HEG from phase to phase of exercise session in **female** (N = 59).

| Variables                    | $\beta$   | SE   | $\chi^2$ | p   |
|------------------------------|-----------|------|----------|-----|
| Intensity* ^                 |           |      |          |     |
| Moderate                     | Reference |      |          |     |
| Low/Mod                      | 4.65      | 8.20 | 0.32     | .57 |
| Low                          | 4.48      | 7.25 | 0.38     | .54 |
| Very Low                     | 6.78      | 8.79 | 0.59     | .44 |
| Phase#                       |           |      |          |     |
| Baseline                     | Reference |      |          |     |
| Warmup                       | 0.27      | 2.06 | 0.02     | .90 |
| Exercise                     | 6.90      | 2.86 | 5.83     | .02 |
| Cool down                    | 7.69      | 3.45 | 4.98     | .03 |
| Recovery                     | 7.01      | 3.91 | 3.21     | .07 |
| Intensity × Phase            |           |      |          |     |
| Very Low × Recovery          | -6.08     | 6.06 | 1.26     | .26 |
| Very Low × Cool down         | -7.27     | 5.34 | 1.85     | .17 |
| Very Low × Exercise          | -5.50     | 4.43 | 1.54     | .22 |
| Very Low × Warmup            | 1.08      | 3.19 | 0.11     | .74 |
| Very Low × Baseline          | Reference |      |          |     |
| Low × Recovery               | -4.32     | 5.00 | 0.75     | .39 |
| Low × Cool down              | -1.03     | 4.41 | 0.06     | .82 |
| Low × Exercise               | -1.87     | 3.66 | 0.26     | .61 |
| Low × Warmup                 | 0.66      | 2.63 | 0.06     | .80 |
| Low × Baseline               | Reference |      |          |     |
| Low/Mod × Recovery           | 6.81      | 5.64 | 1.46     | .23 |
| Low/Mod × Cool down          | 5.78      | 4.97 | 1.35     | .25 |
| Low/Mod × Exercise           | 1.34      | 4.12 | 0.11     | .75 |
| Low/Mod × Warmup             | 1.14      | 2.96 | 0.5      | .70 |
| Low/Mod × Baseline           | Reference |      |          |     |
| Weekly frequency of exercise | 1.86      | 2.14 | 0.75     | .39 |

Results were obtained from a generalized estimating equation (GEE), using a model-based estimator structured as an AR1 correlation matrix with a normal probability distribution and an identity link function.

\*Cardiac force meter (CFM) ranges: Moderate, <37.5; Low/Mod(erate), 37.6–42.5; Low, 42.6–47.5; Very Low, > 47.5.

^GEE results are for change from moderate to very low.

#GEE results are for change from baseline to recovery.
